# Supplementary material for: Short-term variability of atmospheric helium revealed through a cryo-enrichment method
Source: Copernicus journal article supplement (doi:10.5194/amt-16-1551-2023), 2023-03-24
Supplement: Supplementary file 1 [file amt-16-1551-2023-supplement.pdf]

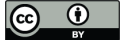

*Supplement of*

## **Short-term variability of atmospheric helium revealed through a cryo-enrichment method**

**Benjamin Birner et al.**

*Correspondence to:* Benjamin Birner ([bbirner@ucsd.edu](mailto:bbirner@ucsd.edu))

The copyright of individual parts of the supplement might differ from the article licence.

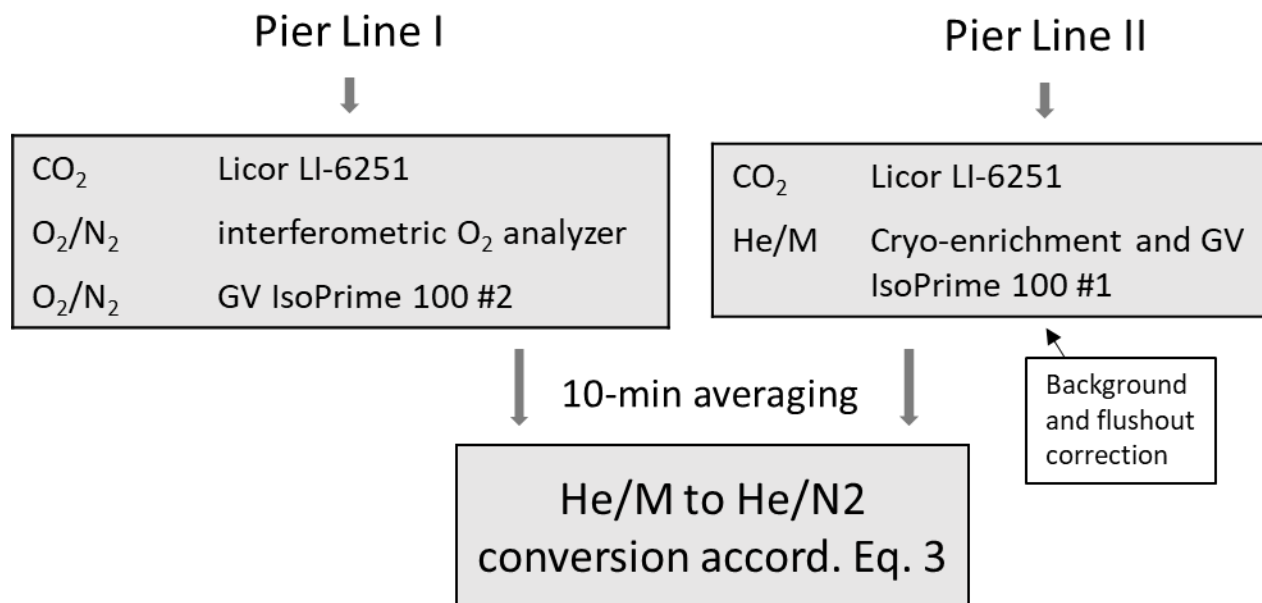

Figure S1. Flow chart of the analysis carried out to obtain He/N<sub>2</sub> data from the two separate gas streams of Pier Line I and Pier Line II.
